# Supplementary material for: Development of a Machine Learning Model for Optimal Applicator Selection in High-Dose-Rate Cervical Brachytherapy
Source: PubMed Central journal article supplement (PMC7973285; doi:10.3389/fonc.2021.611437), 2021-03-05
Supplement: Table_1.pdf [file Table_1.pdf]

TABLE S1. List of compared classifiers, their optimized hyperparameters, final optimized hyperparameter values, and compatability with using weighted samples when training the classifier.

| Classifier                        | Abbreviation | Tuned Hyperparameters                                                                                                                                                                                 | Weighted Samples? |
|-----------------------------------|--------------|-------------------------------------------------------------------------------------------------------------------------------------------------------------------------------------------------------|-------------------|
| AdaBoost Classifier               | ABC          | <i>learning_rate = 1.4</i><br><i>n_estimators = 50</i>                                                                                                                                                | Yes               |
| Gaussian Naïve Bayes Classifier   | GNB          | <i>var_smoothing = 0.00000000001</i>                                                                                                                                                                  | Yes               |
| Gaussian Process Classifier       | GPC          | <i>max_iter_predict = 50</i><br><i>n_restarts_optimizer = 0</i>                                                                                                                                       | No                |
| Gradient Boosting Classifier      | GBC          | <i>learning_rate = 0.09</i><br><i>max_depth = 5</i><br><i>max_features = 3</i><br><i>min_samples_leaf = 15,</i><br><i>min_samples_split = 2</i><br><i>n_estimators = 55</i><br><i>subsample = 0.8</i> | Yes               |
| K-Nearest Neighbours Classifier   | KNN          | <i>algorithm = kd_tree</i><br><i>leaf_size = 3</i><br><i>n_neighbours = 5</i><br><i>p = 1</i>                                                                                                         | No                |
| Linear Discriminant Analysis      | LDA          | <i>solver = svd</i><br><i>store_covariance = True</i><br><i>tol = 0.0000001</i>                                                                                                                       | No                |
| Logistic Regression Classifier    | LRC          | <i>C = 0.01</i><br><i>max_iter = 90</i><br><i>penalty = l2</i><br><i>solver = newton-cg</i><br><i>tol = 0.00001</i>                                                                                   | Yes               |
| Multi-layer Perceptron Classifier | MLPC         | <i>activation = relu</i><br><i>alpha = 0.001</i><br><i>max_iter = 200</i><br><i>solver = lbfgs</i><br><i>tol = 0.00001</i>                                                                            | No                |
| Nearest Centroid Classifier       | NCC          | <i>metric = cosine</i><br><i>shrink_threshold = 0.00001</i>                                                                                                                                           | No                |
| Nu-Support Vector Classifier      | NuSVC        | <i>gamma = 1</i><br><i>kernel = rbf</i><br><i>nu = 0.45</i><br><i>shrinking = False</i><br><i>tol = 0.00001</i>                                                                                       | Yes               |
| Quadratic Discriminant Analysis   | QDA          | <i>reg_param = 0.0000001</i><br><i>tol = 0.0000001</i>                                                                                                                                                | No                |
| Random Forest Classifier          | RFC          | <i>max_depth = 7</i><br><i>max_features = 2</i><br><i>min_samples_leaf = 2</i><br><i>min_samples_split = 2</i><br><i>n_estimators = 75</i>                                                            | Yes               |
